# Supplementary material for: An IGFBP7hi endothelial cell subset drives T cell extravasation in psoriasis via endothelial glycocalyx degradation
Source: JCI journal article supplement (doi:10.1172/jci160451), 2023-03-14
Supplement: sd1 [file 1]

# Supplemental Materials

**This PDF file includes:**

Supplemental Methods

References

Supplemental Figures and Legends 1 to 15

Supplemental Tables 1 to 3

Captions for Supplemental Movies 1 to 3

Captions for Supplemental Data 1 to 2

**Other Supplemental Materials for this manuscript include the following:**

Supplemental Movies 1 to 3

Supplemental Data 1 to 2 (Excel format)

## Supplemental Methods

### 1. Single-cell isolation, sequencing, and data preprocessing

Single skin endothelial cells from psoriasis patients were isolated and sequenced, generating a single-cell RNA sequencing (scRNA-seq) dataset. To analyze the differences between psoriatic and healthy skin vascular endothelial cells (ECs), this psoriatic dataset was further combined with the scRNA-seq dataset of normal human skin ECs (National Genomics Data Center, <https://ngdc.cnbc.ac.cn>, PRJCA002692) that we recently reported (1). Detailed information on (i) single endothelial cell isolation from psoriasis patients, (ii) library preparation and sequencing of the psoriatic scRNA-seq dataset, and (iii) quality control, integration, and batch correction of healthy and psoriatic scRNA-seq datasets were as follows.

**(i) Single endothelial cell isolation from psoriasis patients.** Endothelial cells, collected from the skin biopsies of four psoriasis patients (Supplemental Table 1), were isolated by a magnetic- and fluorescence-activated cell sorting strategy as previously described (1). In brief, human skin tissues were cut into small pieces immediately after surgery and were transferred into RPMI-1640 medium (Gibco, cat. No. 21870092) containing 2.5 mg/mL Dispase II (Gibco, cat. No. 17105041) overnight (4 °C). After removing the epidermis layer, the dermis tissue was homogenized and digested in RPMI-1640 medium containing 1 mg/mL type IV collagenase (Worthington, cat. No. LS004188), 0.2 mg/mL hyaluronidase (Sigma, cat. No. H3506), 0.2 mg/mL Dnase I (Sigma, cat. No. DN25), and 10 mM HEPES (Gibco, cat. No. 15630080) for 40 min (38 °C, 265 r/min). 10 mL of precooled washing buffer (4 °C) was added to the cell suspension to terminate the digestion. Then, the cell suspension was first used to enrich CD31<sup>+</sup> cells via the CD31 MicroBead Kit (Miltenyi Biotec, cat. No. 130-091-935) according to the manufacturer's instructions. The CD31<sup>+</sup> cells obtained by magnetic-activated cell sorting were further processed to select live CD31<sup>+</sup> and CD45<sup>-</sup> endothelial cells via fluorescence-activated cell sorting using a MoFlo XDP cell sorter (Beckman Coulter). Cells were incubated with anti-human CD31 antibody conjugated with FITC (BioLegend, cat. No. 303103), anti-human CD45 antibody conjugated with APC (BioLegend, cat. No. 304011), and 7-AAD (BioLegend, cat. No. 420403). Flow cytometric data were analyzed using FlowJo software. Cell viability was examined by Trypan blue staining (Sigma, cat. No. T8154) and controlled with a threshold set at > 90%.

**(ii) Library preparation and sequencing of the psoriatic scRNA-seq dataset.** Freshly sorted skin endothelial cells from psoriasis patients were immediately processed for library preparation and sequencing by Genergy Biotechnology (Shanghai) Co., Ltd., according to the 10X Genomics guidelines. The sample was sequenced with a cell number of 3,999, a sequencing depth of 89,065 reads per cell, a sequencing saturation rate of 80.5%, and a median of 2,481 genes per cell. Demultiplexing, read alignment, and quality control were performed at Genergy Biotechnology (Shanghai) Co., Ltd., using the CellRanger package. The gene expression matrix was further imported into R (version 3.6.3) for quality control, data integration, batch correction, and further analysis.

**(iii) Quality control, integration, and batch correction.** For quality control, genes expressed in fewer than 3 cells and cells expressing fewer than 200 genes were removed from the gene expression matrix. Then, low-quality cells were filtered out using the quickPerCellQC function (nmads = 1.5) in the Scater package (version 1.14.6). To integrate the scRNA-seq datasets

of healthy and psoriatic skin ECs, 2,000 endothelial cells from the healthy scRNA-seq dataset (1) were randomly subsampled, and the FindIntegrationAnchors and IntegrateData functions in the Seurat package (version 3.1.2) were applied. For batch effect correction, fast MNN in the SeuratWrappers package (version 0.1.0) was performed.

To annotate cell clusters in the psoriatic scRNA-seq dataset, FindTransferAnchors and TransferData functions in the Seurat package were used, which is a well-accepted data integration method (2). The cell annotations in the scRNA-seq dataset of healthy ECs were used as reference data. Psoriatic single cells with prediction scores below 0.5 were excluded (8.65% of cells). We further examined possible contamination of other cell types. One cell with no expression of endothelial markers (*PECAMI* and *CDH5*) and positive expression of smooth muscle cells (*RGS5*) was filtered out. Other non-endothelial cells, defined by positive expression as fibroblasts (*COL1A1*), pericytes (*PDGFRA* and *PDGFRB*), or red blood cells (*HBA1*, *HBA2*, and *HBB*), and no expression of *PECAMI* and *CDH5*, were not found.

For further analysis, scRNA-seq data were normalized and scaled. The variabilities in the number of counts, features, and percentages of mitochondrial and ribosomal genes were regressed out. The detailed methods of further analysis are provided in the Methods section of the main text.

## 2. Histology

The dorsal skin tissues of the mice were fixed in formalin, embedded in paraffin, and sectioned at 4  $\mu\text{m}$ . Sections of skin tissues were deparaffinized, stained with H&E solution, and mounted with resinous mounting medium. H&E staining images were acquired with a slide scanner (Olympus Corporation, VS120), and the average epidermal thickness was measured by ImageJ software (version 2.0.0).

## 3. EC culture and treatments

The human dermal microvascular endothelial cell line HMEC-1 was purchased from ATCC (CRL-3243) and cultured in MCDB131 medium (Gibco, cat. no. 10372019) with 10 ng/mL EGF (Sino Biological, cat. no. GMP-10605-HNAE), 1  $\mu\text{g}/\text{mL}$  hydrocortisone (Solarbio, cat. no. IH0100), 10 mM glutamine, and 10% fetal bovine serum (Biological Industries, cat. no. 04-001-1ACS) at 37  $^{\circ}\text{C}$  in 5%  $\text{CO}_2$ .

First, to evaluate the function of IGFBP7 in ECs, HMEC-1 cells were divided into three groups. HMEC-1 cells were treated with 400 ng/mL recombinant human IGFBP7 protein (rhIGFBP7; Sino Biological, cat. no. 13100-H08H) for 3 h. HMEC-1 cells treated with 100  $\mu\text{g}/\text{mL}$  hyaluronidase (Sigma, cat. no. H3506) and 50 mU/mL heparinase III (Sigma, cat. no. H8891) were endothelial glycocalyx-degraded and used as the positive control. HMEC-1 cells treated with the same volume of PBS were used as the negative control. These HMEC-1 cells were further processed for examination of hyaluronic acid (HA) and heparan sulfate (HS) via immunofluorescence staining and cell adhesion assays. The expression levels of *SELE*, *SELP*, and *ICAMI* were detected by quantitative real-time PCR (qPCR) and western blotting.

Second, to identify the upstream cytokines leading to upregulated IGFBP7 expression, recombinant human IL-17A (Sino Biological, cat. no. CT047-HNAE), IL-22 (Sino Biological, cat. no. 13059-HNAE), IL-25 (Sino Biological, cat. no. 10096-H01H), IFN- $\gamma$  (Sino Biological, cat. no.

11725-HNAS), TNF- $\alpha$  (Sino Biological, cat. no. 10602-HNAE), and VEGF-A (Sino Biological, cat. no. 29714-HNAH) at a series of concentrations (20, 50, and 100 ng/mL) were added to the culture medium of HMEC-1 cells. IGFBP7 expression was detected via qPCR and immunofluorescence staining. The secretion of IGFBP7 was examined via ELISA.

Third, to test the critical role of IGFBP7 in endothelial glycocalyx degradation and cell adhesion, IGFBP7 was blocked or knocked down in the presence of IFN- $\gamma$ . In one experiment, a neutralizing antibody was used based on a reported study (3). The conditioned medium of HMEC-1 cells pretreated with 100 ng/mL IFN- $\gamma$  was collected after 48 h (this conditioned medium was further referred to as IFN- $\gamma$ -treated HMEC-1 cell-conditioned medium). The conditioned medium of HMEC-1 cells pretreated with PBS was obtained (this conditioned medium was further referred to as PBS-treated HMEC-1 cell-conditioned medium). Fresh HMEC-1 cells were divided into three groups. The three groups of HMEC-1 cells were stimulated with (i) PBS-treated HMEC-1 cell-conditioned medium and 25  $\mu$ g/mL control IgG, (ii) IFN- $\gamma$ -treated HMEC-1 cell-conditioned medium and 25  $\mu$ g/mL control IgG, or (iii) IFN- $\gamma$ -treated HMEC-1 cell-conditioned medium and 25  $\mu$ g/mL IGFBP7-neutralizing antibody (Sino Biological, cat. no. 13100-MM01) for 3 h. In the other experiment, si-IGFBP7 (forward, 5'-ccaaggacaucuggaagutt-3'; reverse, 5'-acaauccagauguccuuggtt-3') was transfected into HMEC-1 cells via Lipofectamine<sup>TM</sup> 3000 (Invitrogen, cat. no. L3000075) according to the manufacturer's protocol (4). The efficiency of IGFBP7 knockdown was confirmed by qPCR and western blotting. The conditioned medium of HMEC-1 cells transfected with si-IGFBP7 and treated with 100 ng/mL IFN- $\gamma$  was collected (this conditioned medium was further referred to as si-IGFBP7+IFN- $\gamma$  conditioned medium). The conditioned media of HMEC-1 cells transfected with si-NC and treated with 100 ng/mL IFN- $\gamma$  (further referred to as si-NC+IFN- $\gamma$  conditioned medium) or transfected with si-NC and treated with PBS (further referred to as si-NC+PBS conditioned medium) were collected. Fresh HMEC-1 cells were divided into three groups. The three groups of HMEC-1 cells were stimulated with (i) si-NC+PBS conditioned medium, (ii) si-NC+IFN- $\gamma$  conditioned medium, and (iii) si-IGFBP7+IFN- $\gamma$  conditioned medium for 3 h. The HMEC-1 cells in the two experiments were further processed for examination of HA and HS via immunofluorescence staining and cell adhesion assays.

Finally, to investigate the upstream mechanism by which IFN- $\gamma$  modulates IGFBP7 expression, two JAK inhibitors, baricitinib and upadacitinib, were used. The efficiency of baricitinib and upadacitinib in inhibiting the JAK-STAT signaling pathway was confirmed via western blotting. HMEC-1 cells were divided into four groups: (i) PBS and DMSO treatment, (ii) 100 ng/mL IFN- $\gamma$  and DMSO, (iii) 100 ng/mL IFN- $\gamma$  and 10  $\mu$ M baricitinib (MedChemExpress, cat. no. HY-15315), and (iv) 100 ng/mL IFN- $\gamma$  and 10  $\mu$ M upadacitinib (MedChemExpress, cat. no. HY-19569). HMEC-1 cells were collected to examine the expression of IGFBP7 via qPCR, immunofluorescence staining, and western blotting. In addition, to evaluate the role of the JAK-STAT signaling pathway in mediating cell adhesion, the conditioned media of the four groups of HMEC-1 cells mentioned above were obtained and further added to fresh HMEC-1 cells for 3 h. HMEC-1 cells were then processed for cell adhesion assays.

#### **4. Cell adhesion assays**

Coculture and flow assays were carried out to examine the ability of HMEC-1 cells to adhere to CD4<sup>+</sup> T cells.

Peripheral blood freshly collected from healthy donors was lysed in NH<sub>4</sub>Cl buffer to discard red blood cells and then was incubated with anti-CD4 antibody-coated micromagnetic beads (Miltenyi Biotech, cat. no. 130-045-101) for 15 min at 4 °C. After incubation, the sample was added at 2 mL per sterile tube using PBS/EDTA buffer and then centrifuged for 10 min at 300×g. Next, the cells were resuspended in 500 μL of PBS/EDTA buffer and added to a magnetic separation column in the magnetic field of a mini magnetic-activated cell sorting separator (Miltenyi Biotech). After positive selection, the column was washed three times with PBS/EDTA buffer for cell collection. The purity of these selected cells was more than 90%, as confirmed by flow cytometry using a BD LSR Fortessa system (Becton, Dickinson and Company). CD4<sup>+</sup> T cells were stained with 1 μM calcein-AM (Invitrogen, cat. no. C1429) for 15 min at 37 °C for further experiments.

For the static coculture assay, HMEC-1 cells were cultured in 24-well plates. After different treatments (as mentioned above), HMEC-1 cells were washed with PBS. CD4<sup>+</sup> T cells were added to wells (1×10<sup>5</sup> cells per well), together with a new culture medium (MCDB131 and RPMI-1640, Gibco). After 5 h of coculture, each well was gently washed with PBS 5 times to remove CD4<sup>+</sup> T cells that did not adhere to HMEC-1 cells. Five different fields in each well were examined under an immunofluorescence microscope (Nikon Eclipse Ti-S). Cell counts of the images were analyzed by ImageJ software.

For the flow assay, HMEC-1 cells were seeded on the bottom of a single channel flow chamber (ibidi, μ-Slide I<sup>0.6</sup> Luer) and cultured under static conditions until the cells reached 100% confluence. HMEC-1 cells were treated with 100 μg/mL hyaluronidase (Sigma) and 50 mU/mL heparinase III (Sigma) or 400 μg/mL rhIGFBP7 protein (Sino Biological, cat. no. 13100-H08H) for 3 h. Then, the medium was replaced with fresh cell culture medium according to the manufacturer's instructions. The CD4<sup>+</sup> T cell suspension (1×10<sup>4</sup> cells/mL) was flushed through the flow chamber using a high-precision peristaltic pump (Longer Precision Pump Co., Ltd., BT100-2J) at a controlled flow rate of 1 mL/min, based on the manufacturer's description. The flow of CD4<sup>+</sup> T cells was filmed under an immunofluorescence microscope (Olympus, IX71). The adhered CD4<sup>+</sup> T cells were counted at the end of the flow assay.

## 5. Immunofluorescence staining

Skin lesions from patients with psoriasis vulgaris, atopic dermatitis (AD), systemic lupus erythematosus (SLE), and scleroderma and skin tissues from healthy donors (Supplemental Table 1) and mice were obtained; fixed in 4% paraformaldehyde; and embedded in paraffin. For immunofluorescence staining, tissue sections were deparaffinized and subjected to antigen retrieval with Tris-EDTA buffer (pH 9.0). After blocking non-specific staining with 5% goat serum in PBS for 1 h at room temperature, the sections were incubated with primary antibodies (Supplemental Table 2) overnight (4 °C) and then were incubated with secondary antibodies for 1 h (room temperature). Hoechst staining (1:1000) was used to indicate the cell nucleus (10 min, room temperature).

HMEC-1 cells seeded in confocal dishes were fixed in 4% paraformaldehyde for 15 min, blocked with 5% goat serum in PBS for 1 h at room temperature, and incubated with primary antibodies (Supplemental Table 2) overnight (4 °C). Dishes were washed gently with PBS before incubation with secondary antibodies and Hoechst staining. Dishes were preserved in PBS at 4 °C

before imaging.

For visualization of blood vessels and CD3<sup>+</sup> T cells in murine ear skin, whole-mount immunofluorescence staining was carried out as previously described with minor modifications (5). In brief, mice were intravenously injected with 100  $\mu$ L of TRITC-dextran (500 kDa, 10 mg/mL; Sigma, cat. no. 52194) 10 min before sacrifice. The dorsal side of the ear was carefully dissected, fixed in 4% paraformaldehyde, permeabilized in 0.3% Triton X-100 in PBS (PBST), and blocked with 3% skim milk in PBST. The ear skin was incubated with an anti-mouse CD3 antibody (Abcam, cat. no. ab135372, 1:200) at 4 °C for 24 h. After being washed in 0.05% Tween-20 in PBS, the samples were incubated with secondary antibodies at room temperature for 2 h before washing and mounting.

Images of all the specimens were captured by a confocal microscope (Carl Zeiss, LSM880). Negative controls that were stained with secondary antibodies were included in all experiments. Image analysis, including quantifications of MFI, percentage of Ki67<sup>+</sup> cells in the basal layer of the epidermis, blood vessel diameter, and infiltrated T cells, were performed by ZEN software (Carl Zeiss, version 1.1.2.0) and ImageJ software. 3D reconstruction, MFI quantification, and volume calculation were performed using Imaris software (version 7.4.2).

## **6. ELISA**

Serum levels of HA, HS, and IGFBP7 in peripheral blood samples from psoriasis patients and healthy individuals or conditioned medium of HMEC-1 cells were quantified using a human hyaluronan Quantikine ELISA kit (R&D Systems, cat. no. DHYALO), human HS ELISA kit (Elabscience, cat. no. E-EL-H2364), and human IGFBP-7 ELISA kit (Elabscience, cat. no. E-EL-H0447). The concentration of IGFBP7 in mouse serum was measured using a mouse IGFBP-rp1/IGFBP-7 ELISA kit (RayBio, cat. no. ELM-IGFBPRP1). All ELISAs were performed according to the manufacturers' protocol.

## **7. Western blotting**

Western blotting was performed using standard methods. In brief, cells were washed in PBS and lysed in RIPA lysis buffer (Beyotime) with a protease inhibitor cocktail (Roche) on ice for 20 min. The total protein concentration was quantified with a BCA Protein Assay kit (Tiangen, cat. no. PA115). Equal amounts of protein were separated on SDS-PAGE gels and transferred to PVDF membranes (Millipore). The membrane was blocked with 5% skim milk, incubated with primary antibodies (Supplemental Table 2) overnight at 4 °C, and then incubated with HRP-conjugated secondary antibodies for 1 h at room temperature. Blots were visualized by the ChemiDoc<sup>TM</sup> MP Imaging System (Bio-Rad) and analyzed via Image Lab software (Bio-Rad, version 6.0).

## **8. qPCR**

Total RNA from skin specimens or cultured cells was extracted by TRIzol reagent (Invitrogen) and then reverse-transcribed to cDNA using the PrimeScript RT Reagent Kit (TaKaRa, cat. no. RR047A). qPCR was performed using SYBR Premix Ex Taq II (TaKaRa, cat. no. RR820A) on an iQ5 PCR Detection System (Bio-Rad). The relative mRNA expression levels were calculated based on the  $2^{-\Delta\Delta CT}$  method. The sequences of the primers used in this study are provided in Supplementary Table 3.

## References

1. Li Q, et al. Single-cell transcriptome profiling reveals vascular endothelial cell heterogeneity in human skin. *Theranostics*. 2021;11(13):6461–6476.
2. Stuart T, et al. Comprehensive integration of single-cell data. *Cell*. 2019;177(7):1888-1902.e21.
3. Lee WC, et al. Plasmodium-infected erythrocytes induce secretion of IGFBP7 to form type II rosettes and escape phagocytosis. *Elife*. 2020;9:e51546.
4. Zhang J, et al. Decreasing growth differentiation factor 15 promotes inflammatory signals and neutrophil infiltration in psoriasis models. *J Invest Dermatol*. 2022;S0022-202X(22)01885–1.
5. Zhang Y, et al. Heterogeneity in VEGFR3 levels drives lymphatic vessel hyperplasia through cell-autonomous and non-cell-autonomous mechanisms. *Nat Commun*. 2018;9(1):1296.

## Supplemental Figures and Figure Legends

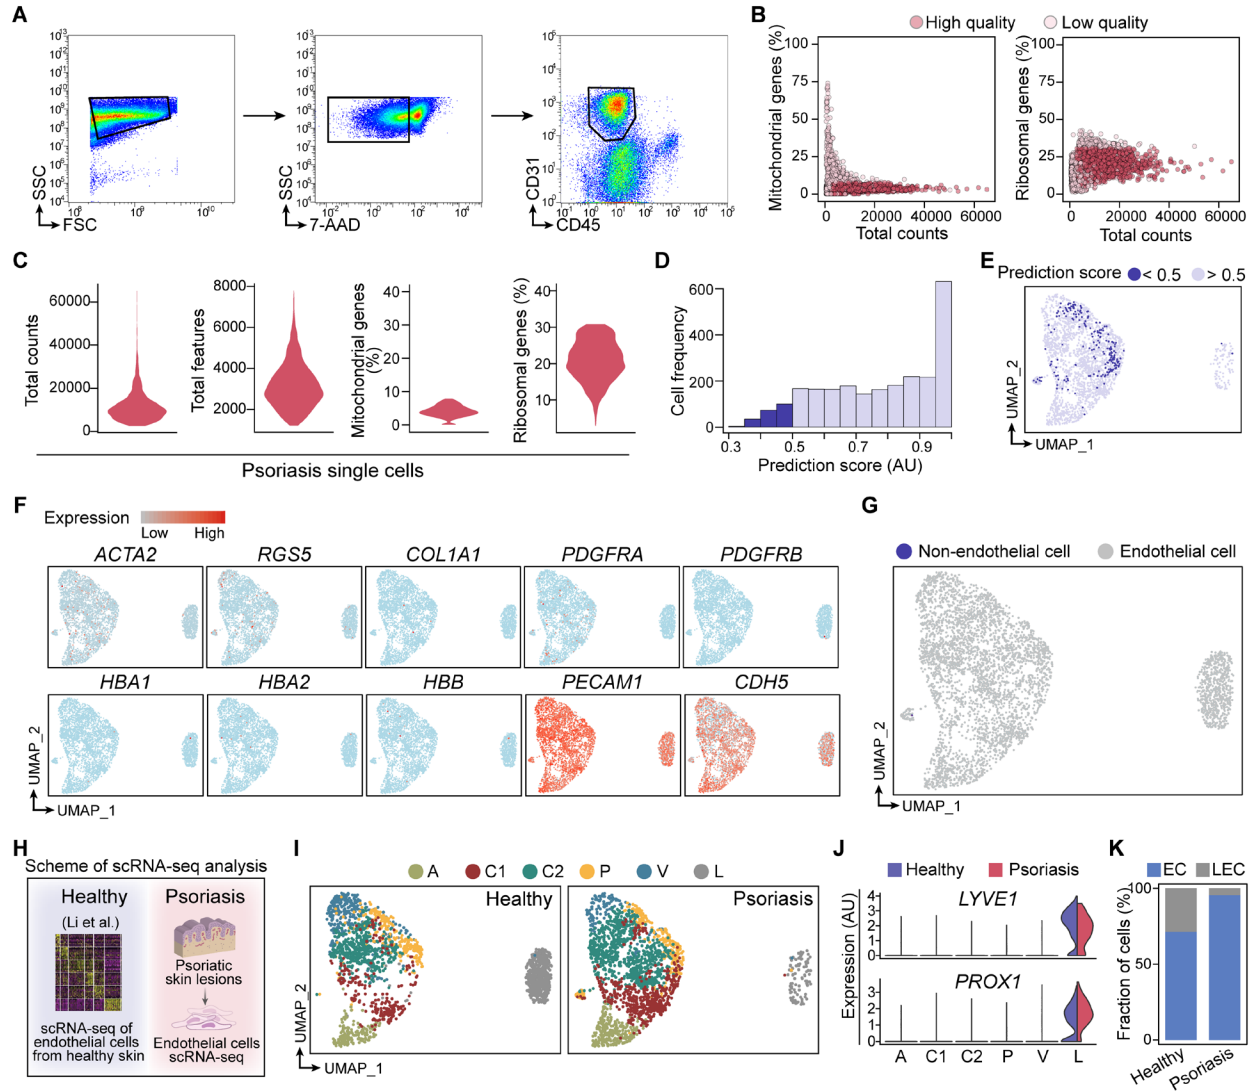

### Supplemental Figure 1. Sorting of psoriatic skin ECs and processing of scRNA-seq dataset.

(A) Gating logic to sort live CD31<sup>+</sup> CD45<sup>-</sup> cells (endothelial cells) from psoriatic skin tissues via flow cytometry. (B) Distribution of total counts, percentage of mitochondrial genes, and percentage of ribosomal genes in psoriasis single cells before quality control. Each circle represents a cell. High-quality cells are colored dark red, and low-quality cells are colored light red. (C) The total counts, total features, mitochondrial gene percentage, and ribosomal gene percentage in the psoriasis scRNA-seq dataset after quality control. (D) The frequency of prediction scores in psoriatic single cells. Healthy skin ECs (Li et al.) were used as a reference dataset. (E) Distribution of psoriatic cells with prediction scores below and above 0.5. (F) Expression of markers of non-endothelial cells, including smooth muscle cells (*ACTA2* and *RGS5*), fibroblasts (*COL1A1*), pericytes (*PDGFRA* and *PDGFRB*), red blood cells (*HBA1*, *HBA2*, and *HBB*), and ECs (*PECAM1* and *CDH5*), in the psoriasis scRNA-seq dataset. (G) UMAP plot showing ECs and non-endothelial cells. (H) Schematic of scRNA-seq analysis of endothelial cells from healthy and psoriatic skin, the former of which was extracted from our previously reported



study (Li et al.). **(I)** UMAP plots showing the clusters of healthy and psoriatic skin endothelial cells, including ECs (clusters A, C1, C2, P, and V) and lymphatic endothelial cells (cluster L). Dots in different colors represent cells in corresponding clusters, which are cluster A (arteriole ECs); clusters C1, C2, and P (capillary ECs); cluster V (venule ECs); and cluster L (lymphatic endothelial cells). **(J)** Violin plots showing the expression of lymphatic endothelial cell markers (*PROX1* and *LYVE1*) in healthy and psoriatic endothelial cells. **(K)** Bar plot showing the proportion of ECs and lymphatic endothelial cells (LECs) in healthy and psoriatic skin.

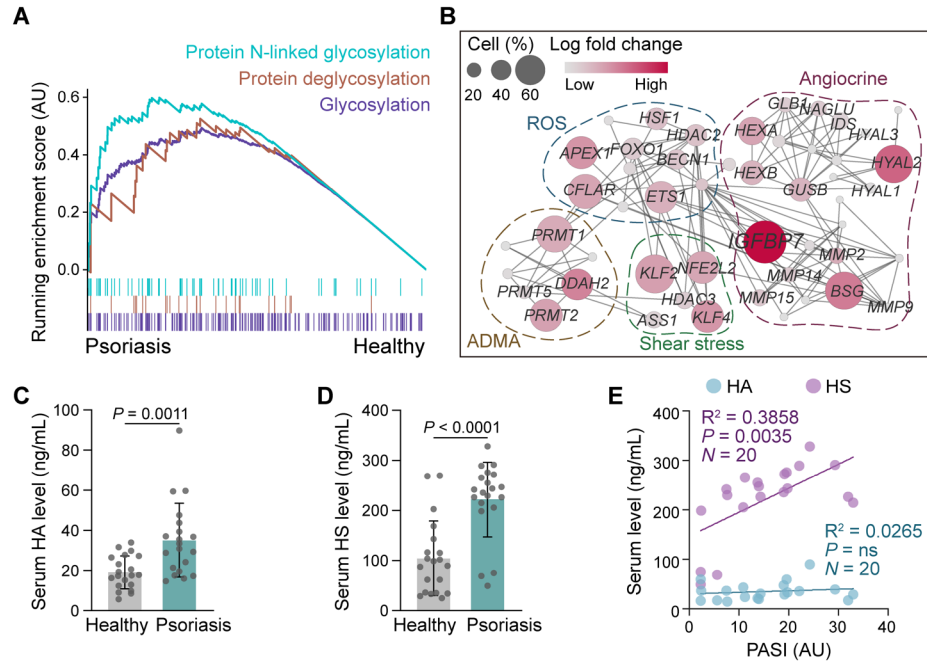

## Supplemental Figure 2. Degradation of the endothelial glycocalyx of skin blood vessels in psoriasis patients.

(A) GSEA enrichment plot showing the pathways enriched in psoriatic capillary ECs compared to healthy capillary ECs. (B) Dot plot showing the expression of genes related to endothelial glycocalyx degradation in psoriatic capillary ECs. Color indicates the log fold change between the average expression of psoriatic capillary ECs vs. healthy capillary ECs. Size indicates the percentage of cells in which the gene is expressed. (C and D) Serum concentrations of HA and HS in peripheral blood from healthy and psoriatic donors ( $n = 20$  blood samples/group). (E) Linear regression analysis of the correlation between the serum HA or HS level and disease severity (psoriasis area and severity index (PASI) score) in psoriasis patients. Data in C and D represent the mean  $\pm$  SD and were analyzed using unpaired Student's t test.

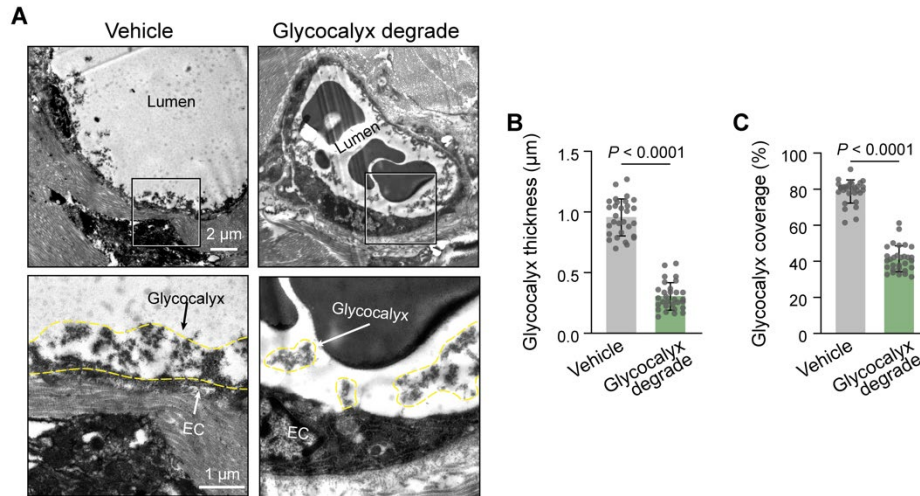

**Supplemental Figure 3. Degradation of the endothelial glycocalyx of skin blood vessels in mice.**

(A) Transmission electron micrographs showing that the endothelial glycocalyx structure in skin blood vessels from control mice ( $n = 6$  mice/group) was successfully degraded by the injection of hyaluronidase and heparinase III. The endothelial glycocalyx is highlighted by the yellow dotted line. (B and C) Quantification of endothelial glycocalyx thickness and coverage ( $n = 30$  vessels of 6 mice/group) in A. All data represent the mean  $\pm$  SD. Analysis was performed using the unpaired Student's t test.

Control mice for Figure 3

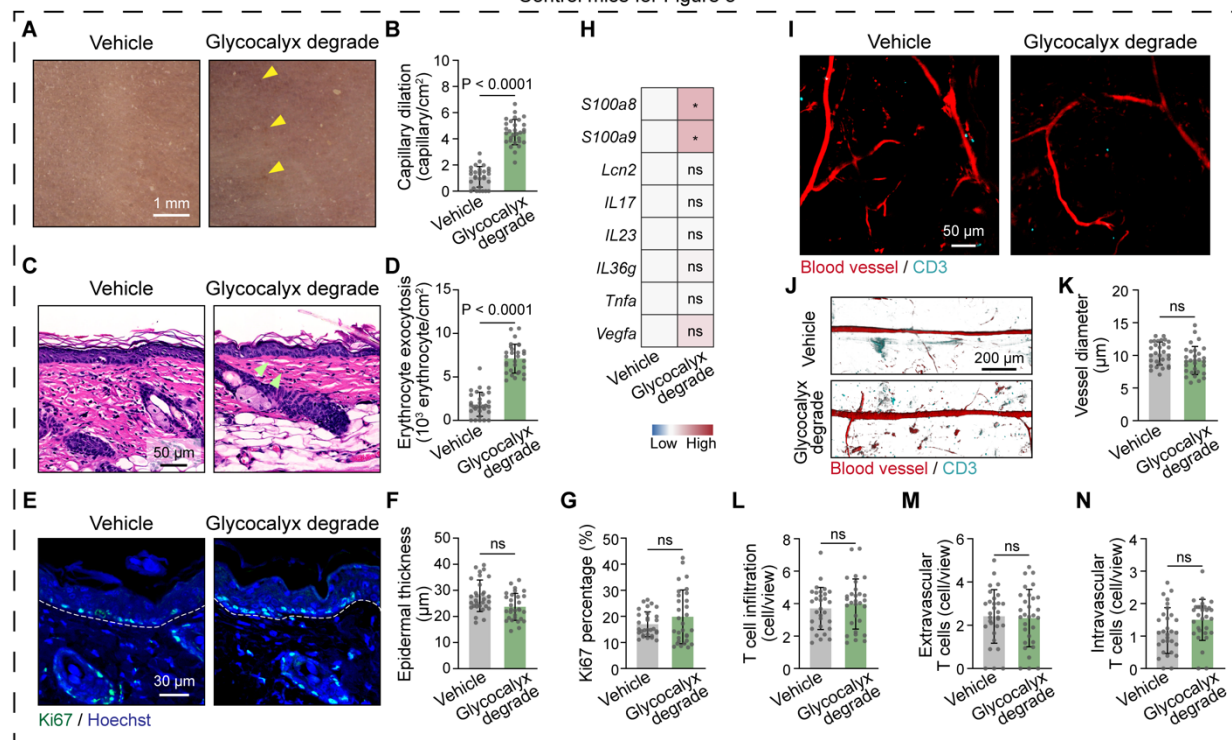

**Supplemental Figure 4. Control mice with or without degradation of the endothelial glycocalyx.**

(A) Dermatoscopy shows the dorsal skin appearance of control mice ( $n = 6$  mice/group) with or without endothelial glycocalyx degradation. Yellow arrowheads, which point at red dots, indicate dilated skin capillaries. (B) Quantification of dilated skin capillaries in A. (C) H&E staining of dorsal skin tissue from control mice ( $n = 6$  mice/group) with or without endothelial glycocalyx degradation. Green arrowheads indicate erythrocyte exocytosis. (D) Quantification of erythrocyte exocytosis in C. (E) Immunofluorescence for Ki67 (green) and Hoechst (blue) of dorsal skin tissue from control mice ( $n = 6$  mice/group) with or without endothelial glycocalyx degradation. The dashed white line marks the interface between the epidermis and dermis. (F and G) Quantification of epidermal thickness and the percentage of Ki67<sup>+</sup> cells in the basal layer in E. (H) Heatmap showing the transcriptional levels of inflammatory genes in the dorsal skin of control mice with or without endothelial glycocalyx degradation via qPCR. (I) Whole-mount immunofluorescence staining for blood vessels (red) and CD3 (cyan) in ear skin from control mice ( $n = 6$  mice/group) with or without endothelial glycocalyx degradation. (J) 3D surface rendering of blood vessels (red) and CD3 (cyan) based on whole-mount immunofluorescence staining. (K–N) The average blood vessel diameter, infiltrated T cells, extravascular T cells, and intravascular T cells were examined in I ( $n = 30$  views of 6 mice/group). All data represent the mean  $\pm$  SD. Analysis was performed using the unpaired Student's *t* test (\* $P < 0.05$ ).

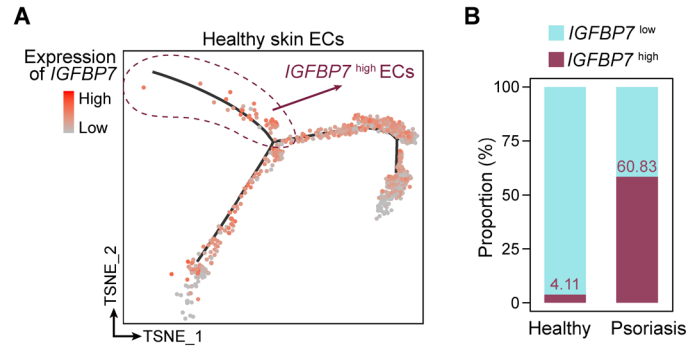

**Supplemental Figure 5. *IGFBP7*<sup>high</sup> EC percentage in healthy and psoriatic ECs.**

(A) UMAP plot showing the expression of *IGFBP7* in healthy skin ECs within the pseudotime trajectory. The dashed line encircles *IGFBP7*<sup>high</sup> ECs. *IGFBP7* expression in psoriatic ECs is provided in Figure 4C. (B) The proportion of *IGFBP7*<sup>high</sup> ECs in healthy and psoriatic skin ECs. The light blue bars represent *IGFBP7*<sup>low</sup> ECs, and the red bars represent *IGFBP7*<sup>high</sup> ECs. The proportion of *IGFBP7*<sup>high</sup> ECs in psoriatic skin ECs was 60.83%, whereas it was 4.11% in healthy skin ECs.

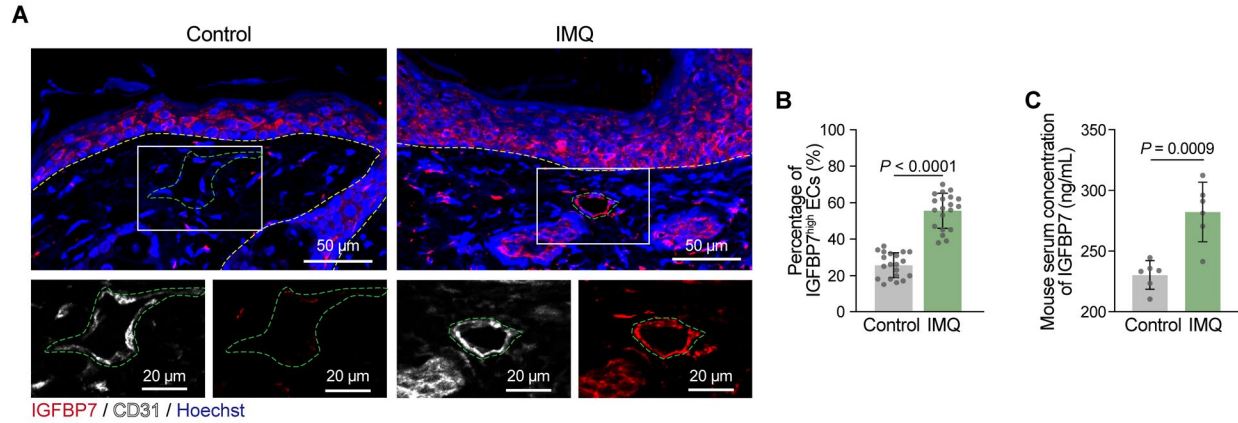

**Supplemental Figure 6. The percentage of IGFBP7<sup>high</sup> skin ECs in IMQ mice and control mice.**

(A) Immunofluorescence of skin lesions from IMQ mice and normal skin from control mice ( $n = 6$  mice/group) for IGFBP7 (red), CD31 (white), and Hoechst (blue). The yellow dashed line marks the interface between the epidermis and dermis. The green dashed line indicates the outline of ECs. (B) The percentage of IGFBP7<sup>high</sup> ECs in skin blood vessels was quantified ( $n = 20$  views/group). (C) Serum IGFBP7 levels in peripheral blood from IMQ mice and control mice ( $n = 6$  mice/group). All data represent the mean  $\pm$  SD. Analysis was performed using the unpaired Student's t test.

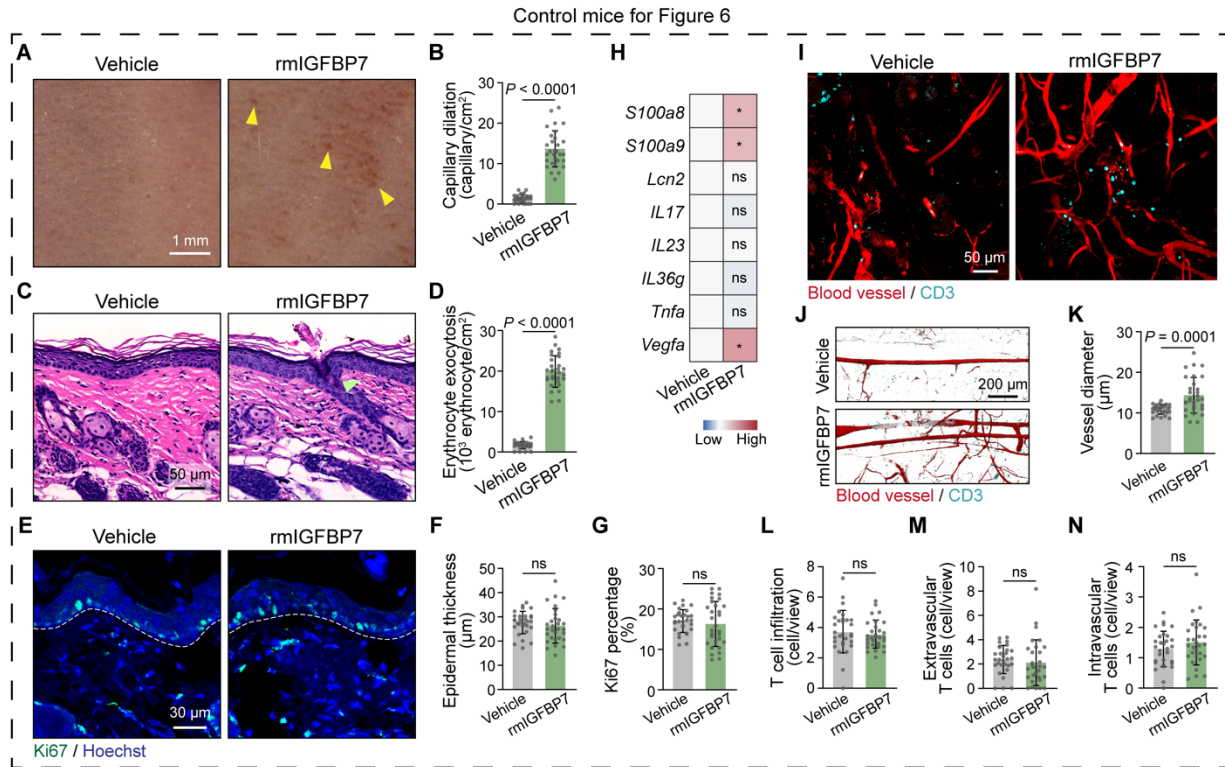

### Supplemental Figure 7. IGFBP7 induces endothelial dysfunction in control mice.

(A) Dorsal skin appearance of control mice ( $n = 6$  mice/group) treated with or without rmIGFBP7 under dermatoscopy. Yellow arrowheads, which point at dark red dots, indicate dilated skin capillaries. (B) Quantification of capillary dilation in A. (C) H&E staining of dorsal skin tissues from control mice treated with or without rmIGFBP7. Green arrowheads indicate erythrocyte exocytosis. (D) Quantification of erythrocyte exocytosis in C. (E) Immunofluorescence for Ki67 (green) and Hoechst (blue) in dorsal skin tissue from control mice ( $n = 6$  mice/group) treated with or without rmIGFBP7. The dashed white line marks the interface between the epidermis and dermis. (F and G) Quantification of epidermal thickness and the percentage of Ki67<sup>+</sup> cells in the basal layer in E. (H) Heatmap showing the transcriptional levels of inflammatory genes in the dorsal skin of control mice treated with or without rmIGFBP7 via qPCR. (I) Whole-mount immunofluorescence staining for blood vessels (red) and CD3 (cyan) in ear skin from control mice ( $n = 6$  mice/group) treated with or without rmIGFBP7. (J) 3D surface rendering of blood vessels (red) and CD3 (cyan) based on whole-mount immunofluorescence staining. (K–N) The average blood vessel diameter, infiltrated T cells, extravascular T cells, and intravascular T cells were examined in I ( $n = 30$  views of 6 mice/group). All data represent the mean  $\pm$  SD. Analysis was performed using the unpaired Student's *t* test (\*  $P < 0.05$ ).

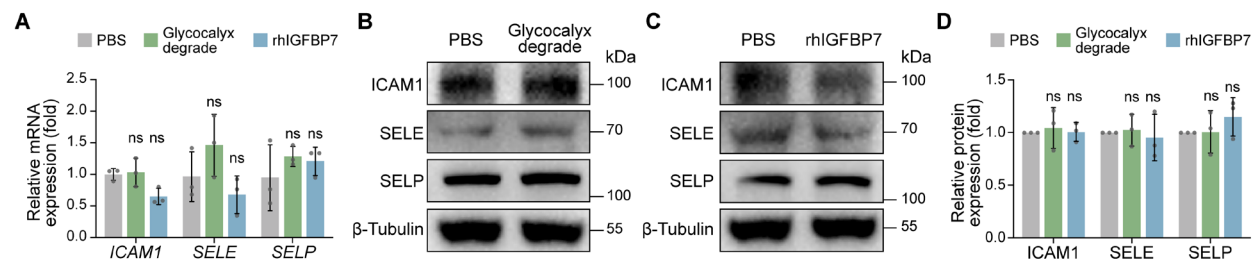

**Supplemental Figure 8. The expression of adhesion molecules is not altered by endothelial glycocalyx degradation or IGFBP7.**

(A) Relative mRNA levels of *ICAM1*, *SELE*, and *SELP* in HMEC-1 cells treated with PBS, endothelial glycocalyx degradation, or rhIGFBP7 ( $n = 3/\text{group}$ ). (B) Representative blots of ICAM1, SELE, SELP, and  $\beta$ -Tubulin in HMEC-1 cells treated with PBS or endothelial glycocalyx degradation.  $\beta$ -Tubulin was used as the loading control ( $n = 3/\text{group}$ ). (C) Representative blots of ICAM1, SELE, SELP, and  $\beta$ -Tubulin in HMEC-1 cells treated with PBS or rhIGFBP7.  $\beta$ -Tubulin was used as the loading control ( $n = 3/\text{group}$ ). (D) Relative quantification of ICAM1, SELE, and SELP in HMEC-1 cells treated with PBS, endothelial glycocalyx degradation, or rhIGFBP7 in B and C. The PBS group was set as 1. All data represent the mean  $\pm$  SD. Analysis was performed using the unpaired Student's t test. Labeled *P* values represent the difference between the corresponding group and the PBS group.



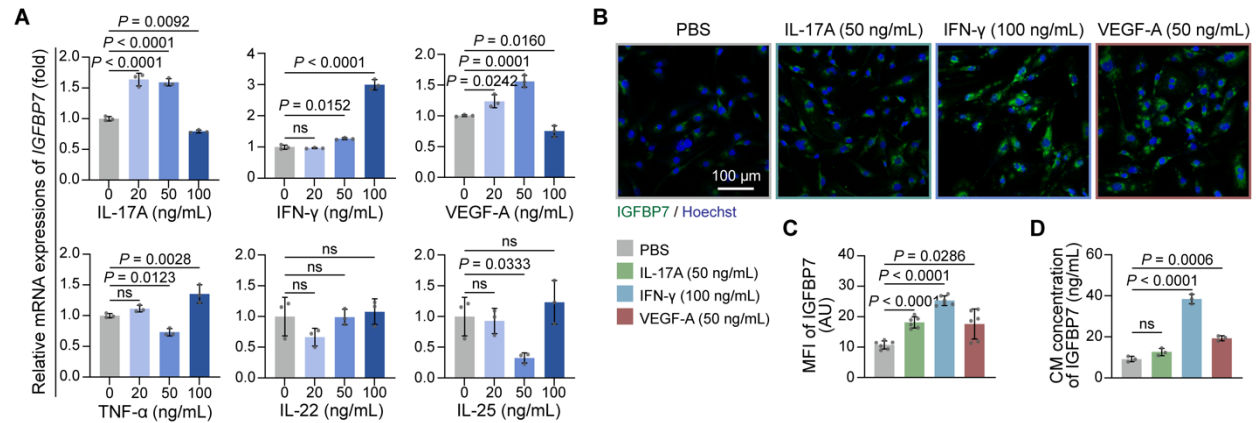

### Supplemental Figure 9. IFN- $\gamma$ upregulates the expression and secretion of IGFBP7 in HMEC-1 cells.

(A) Relative mRNA expression of *IGFBP7* in HMEC-1 cells treated with different concentrations of psoriasis-related cytokines via PCR ( $n = 3$ /group). (B) Immunofluorescence staining of IGFBP7 (green) and Hoechst (blue) in HMEC-1 cells ( $n = 6$ /group) treated with IL-17A (50 ng/mL), IFN- $\gamma$  (100 ng/mL), and VEGF-A (50 ng/mL). (C) Quantification of IGFBP7 MFI in B. (D) ELISA analyzing the IGFBP7 concentration in the conditioned medium (CM) of HMEC-1 cells stimulated with IL-17A (50 ng/mL), IFN- $\gamma$  (100 ng/mL), and VEGF-A (50 ng/mL) ( $n = 3$ /group). All data represent the mean  $\pm$  SD. The analysis in A was performed using 1-way ANOVA with Dunnett's test. Analyses in C and D were performed using the unpaired Student's t test.

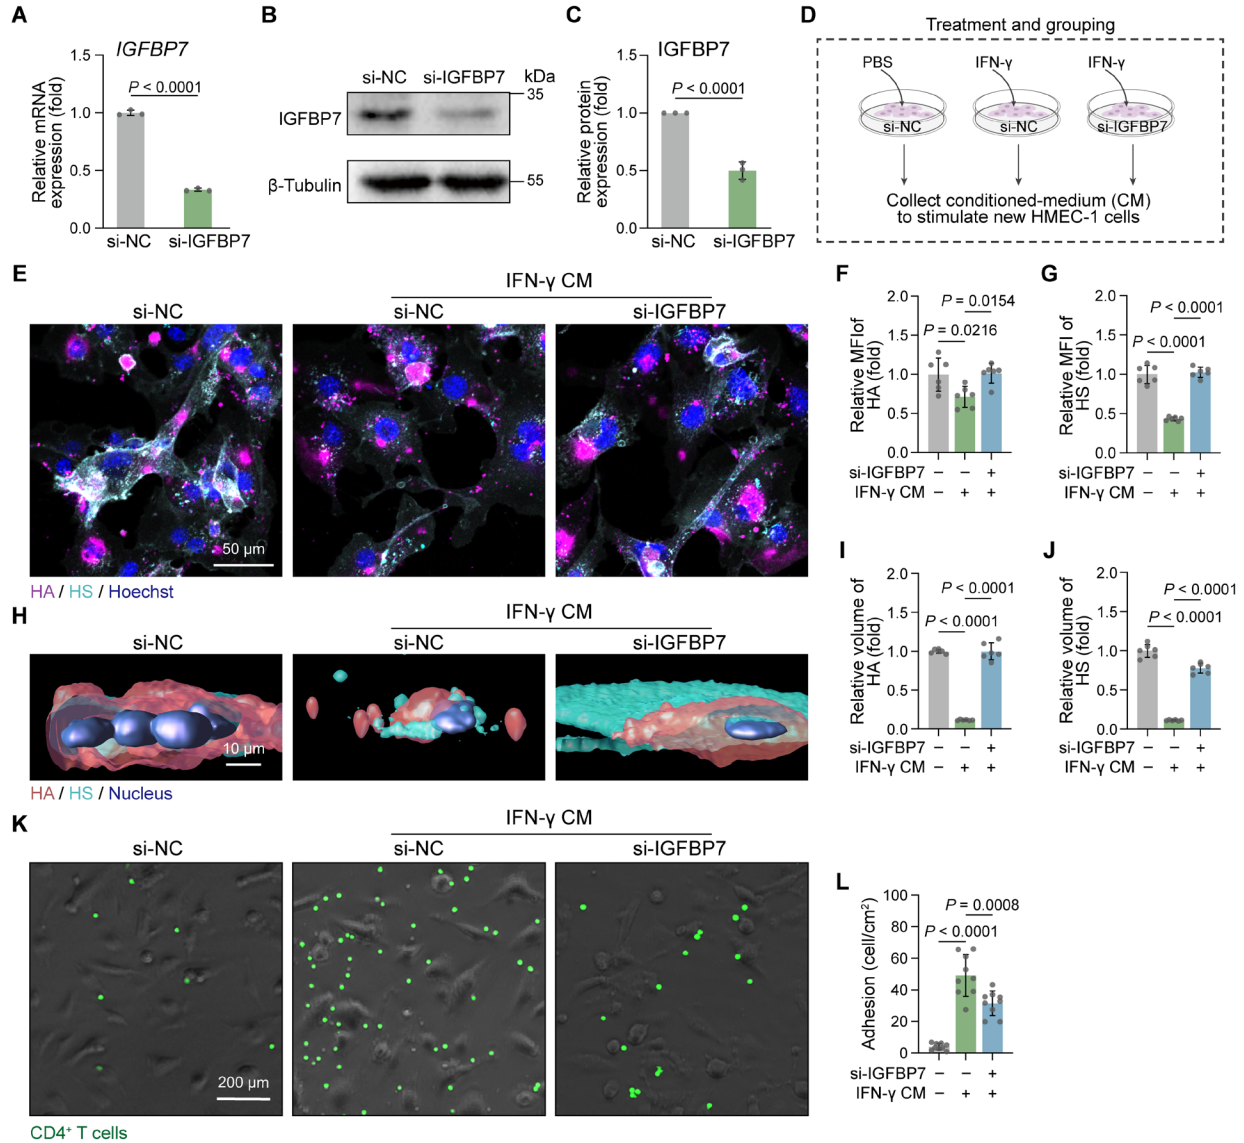

**Supplemental Figure 10. Silencing IGFBP7 restores the endothelial glycocalyx and protects against T cell adhesion.**

(A) qPCR analysis showing the relative mRNA expression of *IGFBP7* in HMEC-1 cells treated with si-IGFBP7 and si-NC ( $n = 3/\text{group}$ ). The si-NC group was used as a control. (B and C) Representative blots and quantification of IGFBP7 and  $\beta$ -Tubulin are shown.  $\beta$ -Tubulin was used as the loading control ( $n = 3/\text{group}$ ). The si-NC group was set as 1. (D) Schemes of the HMEC-1 cell grouping and treatment. Cells pretreated with si-IGFBP7 or si-NC were stimulated with IFN- $\gamma$  or PBS. Then, the conditioned medium (CM) was collected as stimulation for new HMEC-1 cells in which the endothelial glycocalyx components (E–J) and adhesion capacity (K and L) were further examined. (E) Immunofluorescence staining of the endothelial components HA (magenta) and HS (cyan) and Hoechst (blue) in HMEC-1 cells treated with CM from the si-NC group, si-NC + IFN- $\gamma$  group, and si-IGFBP7 + IFN- $\gamma$  group ( $n = 6/\text{group}$ ). (F and G) Relative MFIs of HA and HS were quantified in E. (H) Three-dimensional surface rendering based on immunofluorescence staining of HMEC-1 cells ( $n = 6/\text{group}$ ) for HA (orange) and HS (cyan). (I and J) The relative

volume of HA and HS per cell was quantified in **H**. (**K**) Representative images of adherent CD4<sup>+</sup> T cells after 5 h of coculturing with HMEC-1 cells treated with different CMs ( $n = 9/\text{group}$ ). (**L**) Quantification of the number of adherent CD4<sup>+</sup> T cells in **K**. All data represent the mean  $\pm$  SD. Data in **A** and **C** were analyzed using the unpaired Student's *t* test. Data in **F**, **G**, **I**, **J**, and **L** were analyzed using 1-way ANOVA with Tukey's post hoc test.

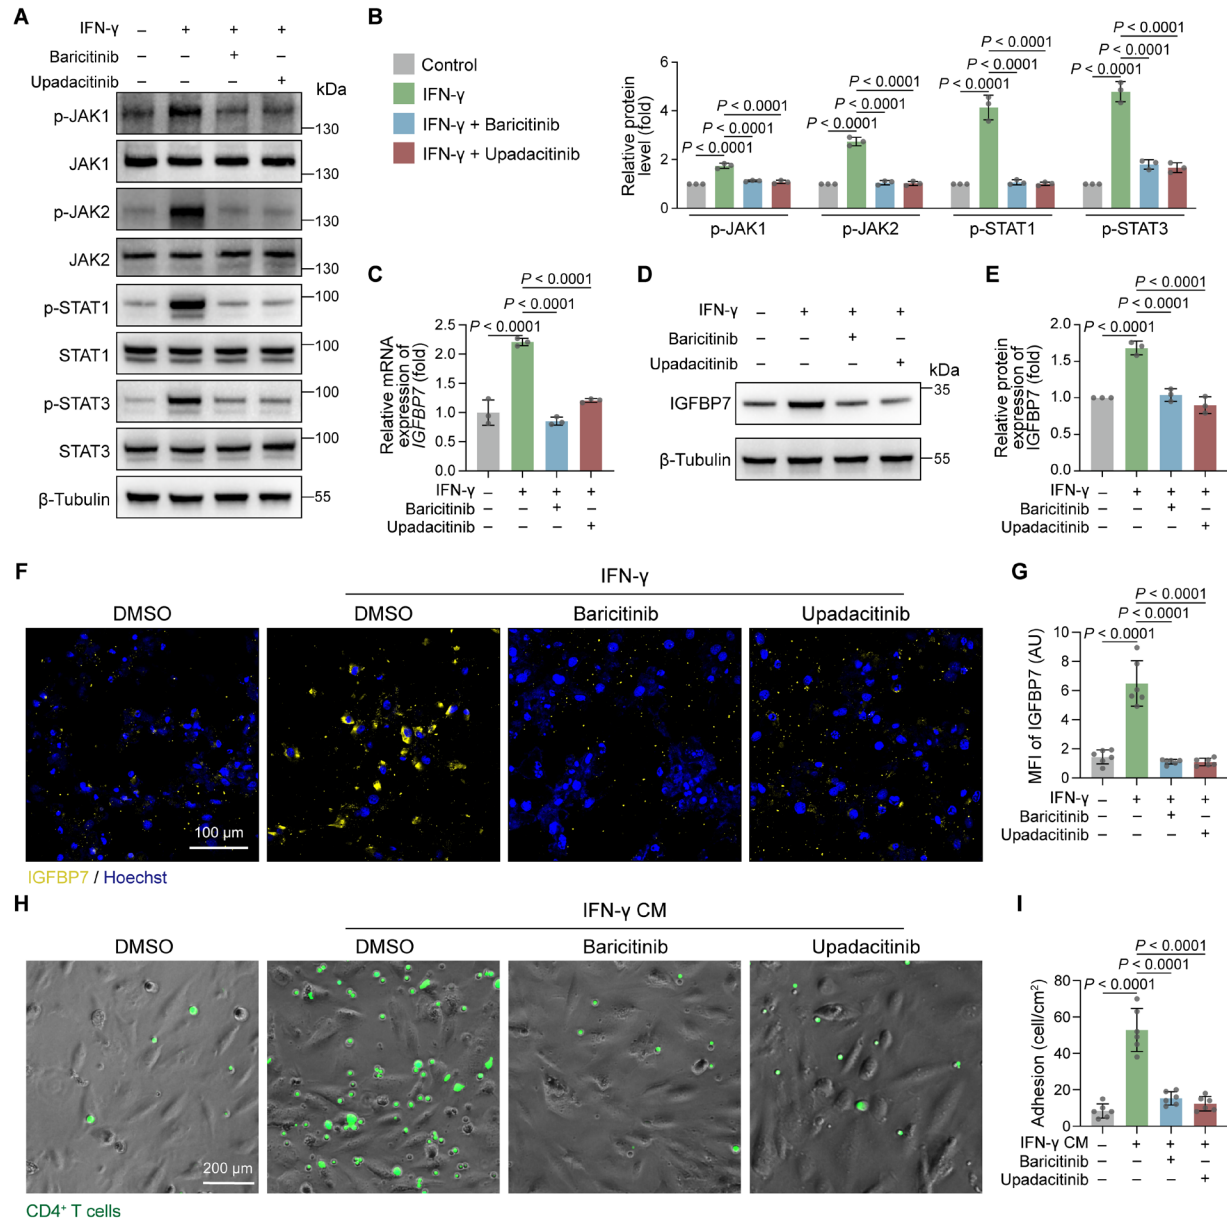

### Supplemental Figure 11. IFN- $\gamma$ upregulates IGFBP7 and promotes T cell adhesion via the JAK1/2-STAT1/3 pathway.

(A and B) Representative blots and quantification of JAK1, phosphorylated JAK1, JAK2, phosphorylated JAK2, STAT1, phosphorylated STAT1, STAT3, phosphorylated STAT3, and  $\beta$ -Tubulin in HMEC-1 cells treated with IFN- $\gamma$  and JAK inhibitors (baricitinib and upadacitinib).  $\beta$ -Tubulin was used as the loading control ( $n = 3$ /group). The control group was set as 1. (C) Relative mRNA expression of *IGFBP7* in HMEC-1 cells treated with IFN- $\gamma$  and JAK inhibitors ( $n = 3$ /group). (D and E) Representative blots and quantification of IGFBP7 and  $\beta$ -Tubulin in HMEC-1 cells treated with IFN- $\gamma$  and JAK inhibitors (baricitinib and upadacitinib).  $\beta$ -Tubulin was used as the loading control ( $n = 3$ /group). The control group was set as 1. (F) Immunofluorescence staining for IGFBP7 (yellow) and Hoechst (blue) in HMEC-1 cells treated with IFN- $\gamma$  and JAK inhibitors ( $n = 6$ /group). (G) Relative MFIs of IGFBP7 in F ( $n = 6$ /group). (H) Representative

images ( $n = 6/\text{group}$ ) of adherent  $\text{CD4}^+$  T cells after 5 h of coculturing with HMEC-1 cells treated with different conditioned media (CM). **(I)** Quantification of adherent  $\text{CD4}^+$  T cells in **H** ( $n = 6/\text{group}$ ). All data represent the mean  $\pm$  SD. Analysis was performed using 1-way ANOVA with Tukey's post hoc test.

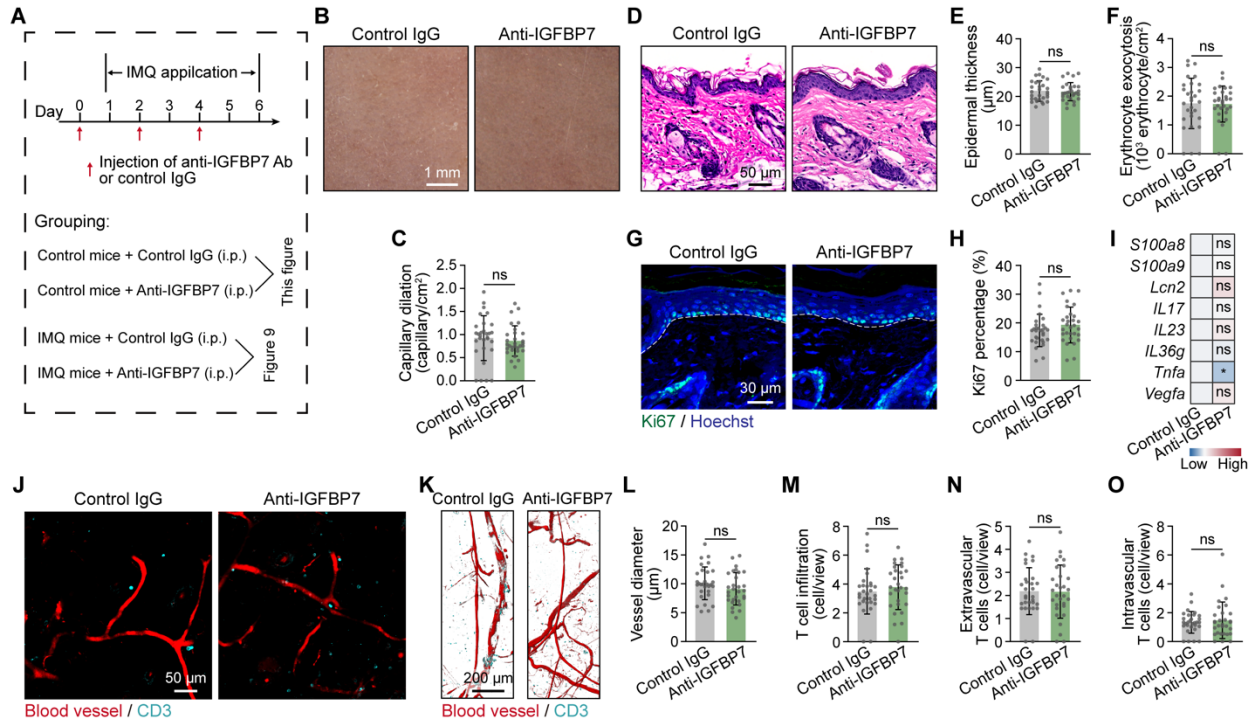

### Supplemental Figure 12. Control mice with or without anti-IGFBP7 treatment.

(A) Scheme of the murine treatment and grouping. The first dose of anti-IGFBP7 treatment started one day before IMQ application. (B) Dorsal skin appearances of dilated capillaries in control mice with or without anti-IGFBP7 treatment ( $n = 6$  mice/group). (C) The number of dilated capillaries in the dorsal skin was quantified in B ( $n = 30$  views of 6 mice/group). (D) H&E staining of dorsal skin tissue in control mice with or without anti-IGFBP7 treatment ( $n = 6$  mice/group). (E) Epidermal thickness of dorsal skin was quantified in D ( $n = 30$  views of 6 mice/group). (F) Exocytotic erythrocytes were quantified in D ( $n = 30$  views of 6 mice per group). (G) Immunofluorescence staining of dorsal skin for Ki67 (green) and Hoechst (blue) in control mice with or without anti-IGFBP7 treatment ( $n = 6$  mice/group). (H) The percentage of Ki67<sup>+</sup> cells in the basal layer of the epidermis was quantified in G. (I) Heatmap showing the transcriptional levels of inflammatory genes in skin tissues via qPCR. (J and K) Whole-mount immunofluorescence staining and 3D surface rendering of blood vessels (red) and CD3 (cyan) within ear skin from control mice with or without anti-IGFBP7 treatment ( $n = 6$  mice/group). (L–O) Quantifications of the average blood vessel diameter, numbers of infiltrated T cells, extravascular T cells, and intravascular T cells in J ( $n = 30$  views of 6 mice/group). All data represent the mean  $\pm$  SD. Analysis was performed using the unpaired Student's t test (\*  $P < 0.05$ ).

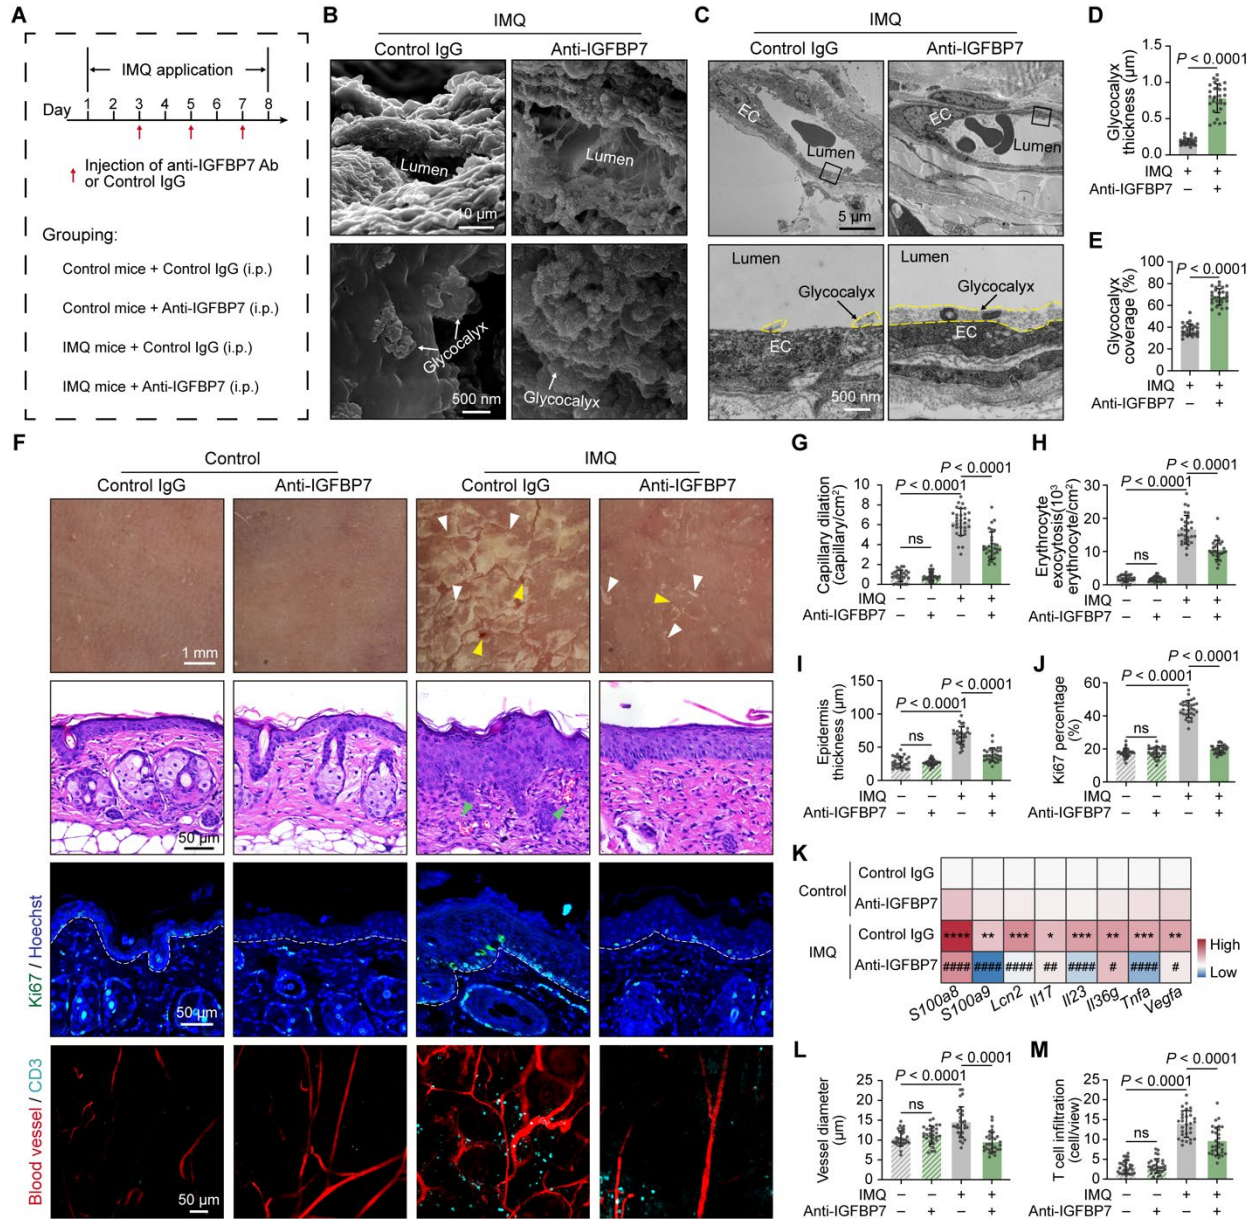

### Supplemental Figure 13. Anti-IGFBP7 treatment restores the endothelial glycocalyx and reduces psoriasis-like skin inflammation in mice.

(A) Scheme of mouse treatments and groupings. The first dose of anti-IGFBP7 treatment started on Day 3 of IMQ application. (B and C) SEM and TEM of the endothelial glycocalyx in skin blood vessels from IMQ mice ( $n = 6$  mice/group) with or without anti-IGFBP7 treatment. (D and E) The endothelial glycocalyx thickness and coverage ( $n = 30$  vessels of 6 mice/group) were examined in C. (F) Dermatoscopy, H&E staining, immunofluorescence staining for Ki67 (green) and Hoechst (blue) in dorsal skin lesions, and whole-mount immunofluorescence for blood vessels (red) and CD3 (cyan) in ear skin lesions ( $n = 6$  mice/group). Yellow arrowheads, pointing at dark red dots, indicate dilated capillaries; white arrowheads, pointing at white plates, indicate scales; green arrowheads indicate erythrocyte exocytosis; the dashed white line marks the interface between the epidermis and dermis. (G–J) Quantification of dilated capillaries (G), erythrocyte exocytosis (H), epidermis thickness (I), and Ki67 percentage (J). (K–M) Heatmap (K) and quantification of vessel diameter (L) and T cell infiltration (M).

epidermis thickness (I), and the percentage of Ki67<sup>+</sup> cells in the basal layer (J) in **F** ( $n = 30$  views/group). (**K**) mRNA levels of inflammatory genes in murine skin ( $n = 6$  mice/group). The asterisk represents the  $P$  value comparing the IMQ and control groups; the hashtag represents the  $P$  value comparing the IMQ after anti-IGFBP7 treatment group and IMQ after control IgG treatment group. (**L** and **M**) Blood vessel diameter and infiltrated T cells were examined in **F** ( $n = 30$  views/group). All data represent the mean  $\pm$  SD. Analysis of data in **D** and **E** was performed using the unpaired Student's  $t$  test. Analysis of data in **G**, **H**, **I**, **J**, **L**, and **M** was performed using 1-way ANOVA with Tukey's post hoc test. (\*/#  $P < 0.05$ , \*\*/##  $P < 0.01$ , \*\*\*/###  $P < 0.001$ , \*\*\*\*/####  $P < 0.0001$ ).



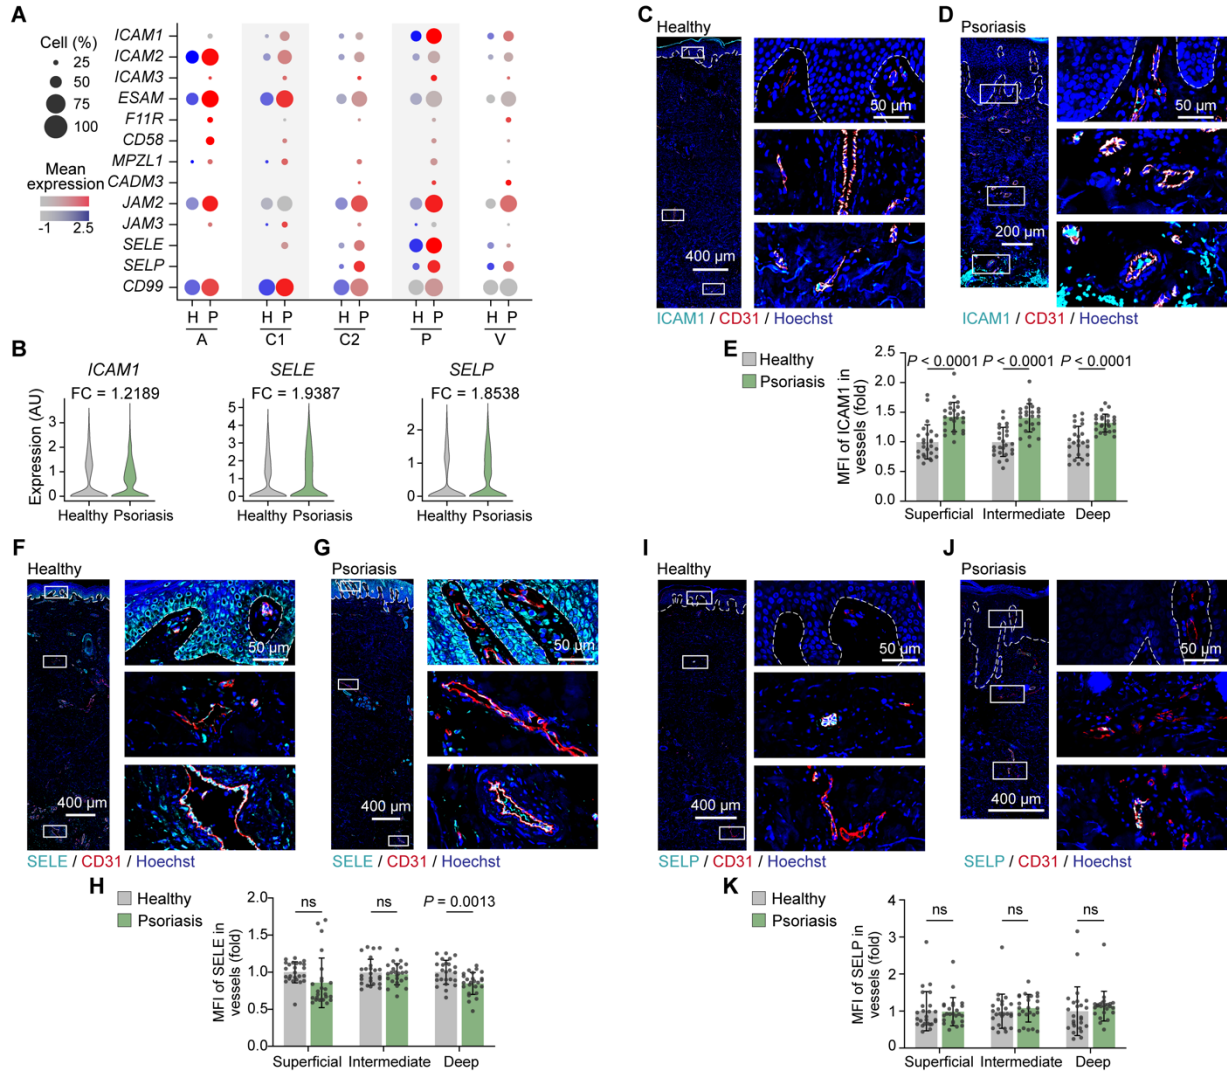

### Supplemental Figure 14. Expression of adhesion molecules in skin ECs from psoriasis patients and healthy controls.

(A) Dot plot showing the expression of adhesion molecules in skin EC clusters of scRNA-seq datasets in healthy individuals (H) and psoriasis patients (P). The size indicates the proportion of cells expressed. Blue dots indicate expression in healthy skin ECs, and red dots indicate expression in psoriatic skin ECs. The expression level was scaled from gray to blue (healthy skin ECs) or from gray to red (psoriatic skin ECs). (B) Violin plots comparing the expression of *ICAM1*, *SELE*, and *SELP* in ECs from psoriatic and healthy skin. Fold change (FC) of gene expression in psoriasis ECs vs. healthy ECs was shown. (C–K) Immunofluorescence of ICAM1, SELE, SELP, and CD31 in psoriatic and healthy skin ( $n = 7$  skin samples/group). Images of the superficial, intermediate, and deep plexuses are magnified. The white dotted line marks the interface between the epidermis and dermis. MFIs of ICAM1, SELE, and SELP in the CD31-positive area were compared between healthy and psoriatic skin ( $n = 25$  vessels in each plexus/group). All data represent the mean  $\pm$  SD. Analysis was performed using the unpaired Student's *t* test.

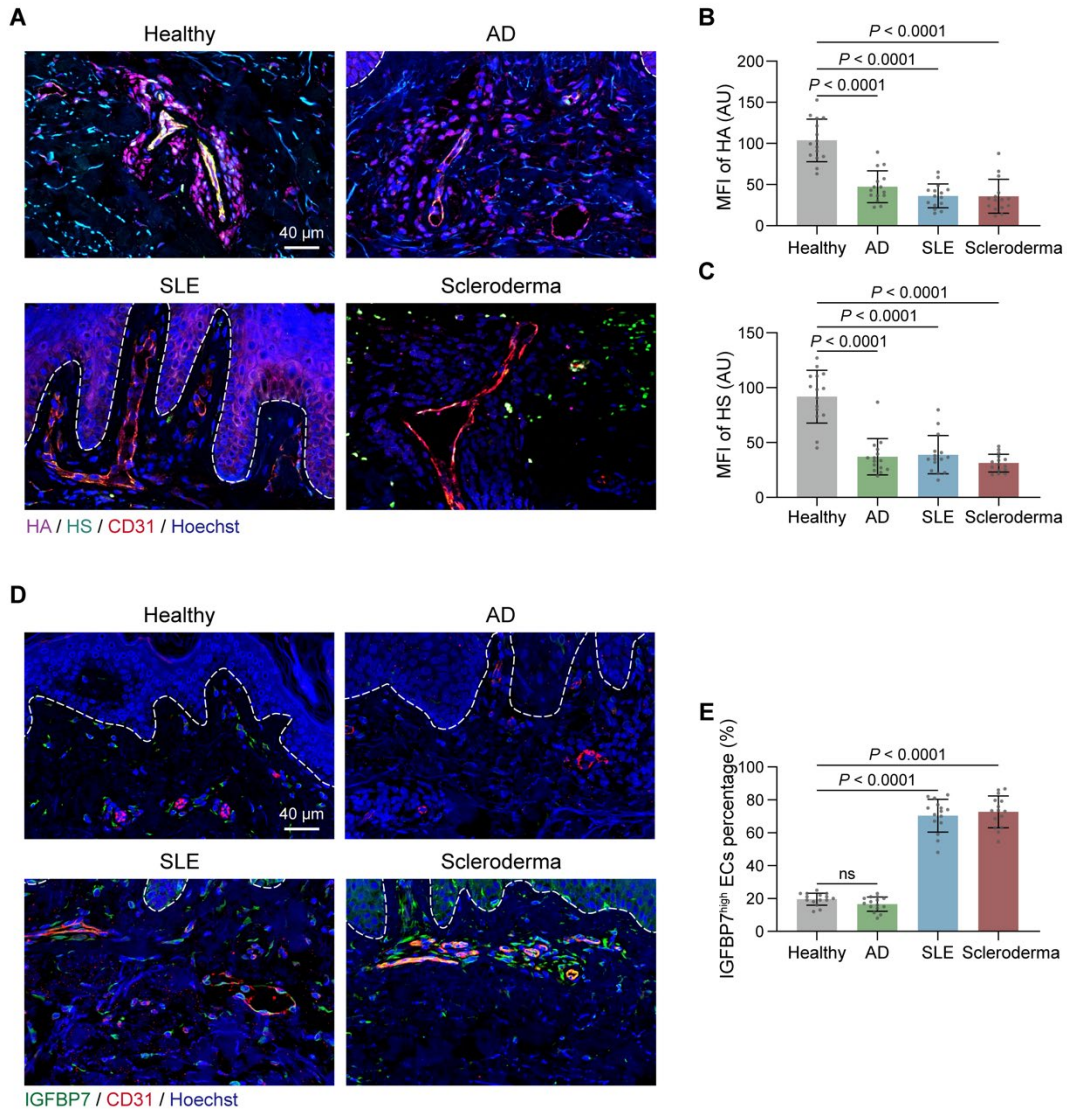

**Supplemental Figure 15. Endothelial glycoalyx and IGFBP7 expression in different inflammatory dermatoses.**

(A) Immunofluorescence of the endothelial glycoalyx components HA (magenta) and HS (cyan), CD31 (red), and Hoechst (blue) in skin tissues from healthy individuals, AD, SLE, and scleroderma patients ( $n = 3$  skin samples/group). (B and C) Quantification of the MFI of HA and HS in A ( $n = 15$  vessels of 3 skin samples/group). (D) Immunofluorescence of IGFBP7 (cyan), CD31 (red), and Hoechst (blue) in skin tissues from healthy individuals, AD, SLE, and scleroderma patients ( $n = 3$  skin samples/group). (E) The percentage of IGFBP7<sup>high</sup> ECs in blood vessels was quantified in D ( $n = 15$  vessels of 3 skin samples/group). All data represent the mean  $\pm$  SD. Analysis was performed using the unpaired Student's t test.

**Supplemental Table 1.**

Clinical information of healthy donors and patients with psoriasis vulgaris, AD, SLE, and scleroderma.

| No.  | Donor   | Age | Gender | PASI | Experiment                  |
|------|---------|-----|--------|------|-----------------------------|
| H 1  | healthy | 33  | male   | /    | immunofluorescence staining |
| H 2  | healthy | 24  | female | /    | immunofluorescence staining |
| H 3  | healthy | 30  | female | /    | immunofluorescence staining |
| H 4  | healthy | 31  | male   | /    | immunofluorescence staining |
| H 5  | healthy | 43  | female | /    | immunofluorescence staining |
| H 6  | healthy | 37  | female | /    | immunofluorescence staining |
| H 7  | healthy | 25  | female | /    | immunofluorescence staining |
| H 8  | healthy | 23  | male   | /    | TEM/SEM                     |
| H 9  | healthy | 29  | female | /    | TEM/SEM                     |
| H 10 | healthy | 32  | male   | /    | TEM/SEM                     |
| H 11 | healthy | 22  | male   | /    | ELISA                       |
| H 12 | healthy | 23  | male   | /    | ELISA                       |
| H 13 | healthy | 24  | male   | /    | ELISA                       |
| H 14 | healthy | 24  | male   | /    | ELISA                       |
| H 15 | healthy | 27  | male   | /    | ELISA                       |
| H 16 | healthy | 28  | male   | /    | ELISA                       |
| H 17 | healthy | 30  | male   | /    | ELISA                       |
| H 18 | healthy | 31  | male   | /    | ELISA                       |
| H 19 | healthy | 32  | male   | /    | ELISA                       |
| H 20 | healthy | 33  | male   | /    | ELISA                       |
| H 21 | healthy | 35  | male   | /    | ELISA                       |
| H 22 | healthy | 36  | male   | /    | ELISA                       |
| H 23 | healthy | 36  | male   | /    | ELISA                       |
| H 24 | healthy | 43  | male   | /    | ELISA                       |
| H 25 | healthy | 45  | male   | /    | ELISA                       |
| H 26 | healthy | 22  | female | /    | ELISA                       |
| H 27 | healthy | 24  | female | /    | ELISA                       |
| H 28 | healthy | 24  | female | /    | ELISA                       |
| H 29 | healthy | 25  | female | /    | ELISA                       |
| H 30 | healthy | 28  | female | /    | ELISA                       |
| H 31 | healthy | 30  | female | /    | ELISA                       |
| H 32 | healthy | 31  | female | /    | ELISA                       |
| H 33 | healthy | 32  | female | /    | ELISA                       |
| H 34 | healthy | 33  | female | /    | ELISA                       |
| H 35 | healthy | 35  | female | /    | ELISA                       |
| H 36 | healthy | 37  | female | /    | ELISA                       |
| H 37 | healthy | 39  | female | /    | ELISA                       |

|       |                    |    |        |      |                             |
|-------|--------------------|----|--------|------|-----------------------------|
| PV 1  | psoriasis vulgaris | 20 | female | 10.2 | scRNA-seq                   |
| PV 2  | psoriasis vulgaris | 25 | male   | 11.5 | scRNA-seq                   |
| PV 3  | psoriasis vulgaris | 37 | female | 16.4 | scRNA-seq                   |
| PV 4  | psoriasis vulgaris | 60 | female | 21.6 | scRNA-seq                   |
| PV 5  | psoriasis vulgaris | 34 | female | 11   | immunofluorescence staining |
| PV 6  | psoriasis vulgaris | 30 | male   | 16.9 | immunofluorescence staining |
| PV 7  | psoriasis vulgaris | 47 | male   | 28.2 | immunofluorescence staining |
| PV 8  | psoriasis vulgaris | 45 | male   | 14   | immunofluorescence staining |
| PV 9  | psoriasis vulgaris | 39 | female | 28.8 | immunofluorescence staining |
| PV 10 | psoriasis vulgaris | 18 | male   | 12   | immunofluorescence staining |
| PV 11 | psoriasis vulgaris | 32 | male   | 10.5 | immunofluorescence staining |
| PV 12 | psoriasis vulgaris | 42 | female | 15.4 | TEM/SEM                     |
| PV 13 | psoriasis vulgaris | 28 | male   | 10.6 | TEM/SEM                     |
| PV 14 | psoriasis vulgaris | 37 | male   | 18.4 | TEM/SEM                     |
| PV 15 | psoriasis vulgaris | 24 | male   | 2.3  | ELISA                       |
| PV 16 | psoriasis vulgaris | 32 | male   | 2.3  | ELISA                       |
| PV 17 | psoriasis vulgaris | 24 | female | 2.4  | ELISA                       |
| PV 18 | psoriasis vulgaris | 25 | female | 2.4  | ELISA                       |
| PV 19 | psoriasis vulgaris | 30 | female | 3    | ELISA                       |
| PV 20 | psoriasis vulgaris | 45 | female | 5.6  | ELISA                       |
| PV 21 | psoriasis vulgaris | 33 | male   | 6.3  | ELISA                       |
| PV 22 | psoriasis vulgaris | 32 | female | 6.5  | ELISA                       |
| PV 23 | psoriasis vulgaris | 41 | female | 6.8  | ELISA                       |
| PV 24 | psoriasis vulgaris | 28 | male   | 7.5  | ELISA                       |
| PV 25 | psoriasis vulgaris | 48 | female | 7.7  | ELISA                       |
| PV 26 | psoriasis vulgaris | 23 | male   | 8.2  | ELISA                       |
| PV 27 | psoriasis vulgaris | 45 | female | 10.9 | ELISA                       |
| PV 28 | psoriasis vulgaris | 22 | male   | 11.2 | ELISA                       |
| PV 29 | psoriasis vulgaris | 28 | female | 13.2 | ELISA                       |
| PV 30 | psoriasis vulgaris | 43 | male   | 13.8 | ELISA                       |
| PV 31 | psoriasis vulgaris | 18 | male   | 14   | ELISA                       |
| PV 32 | psoriasis vulgaris | 18 | male   | 14.4 | ELISA                       |
| PV 33 | psoriasis vulgaris | 44 | male   | 15.2 | ELISA                       |
| PV 34 | psoriasis vulgaris | 47 | male   | 19   | ELISA                       |
| PV 35 | psoriasis vulgaris | 36 | male   | 19.2 | ELISA                       |
| PV 36 | psoriasis vulgaris | 45 | male   | 19.6 | ELISA                       |
| PV 37 | psoriasis vulgaris | 27 | male   | 19.8 | ELISA                       |
| PV 38 | psoriasis vulgaris | 36 | male   | 22.2 | ELISA                       |
| PV 39 | psoriasis vulgaris | 57 | female | 22.2 | ELISA                       |
| PV 40 | psoriasis vulgaris | 39 | female | 23.4 | ELISA                       |
| PV 41 | psoriasis vulgaris | 33 | female | 24.3 | ELISA                       |

|       |                              |    |        |      |                             |
|-------|------------------------------|----|--------|------|-----------------------------|
| PV 42 | psoriasis vulgaris           | 35 | male   | 25.6 | ELISA                       |
| PV 43 | psoriasis vulgaris           | 30 | male   | 25.8 | ELISA                       |
| PV 44 | psoriasis vulgaris           | 31 | male   | 29.4 | ELISA                       |
| PV 45 | psoriasis vulgaris           | 20 | male   | 32   | ELISA                       |
| PV 46 | psoriasis vulgaris           | 31 | female | 33   | ELISA                       |
| AD 1  | atopic dermatitis            | 4  | female | /    | immunofluorescence staining |
| AD 2  | atopic dermatitis            | 8  | female | /    | immunofluorescence staining |
| AD 3  | atopic dermatitis            | 10 | male   | /    | immunofluorescence staining |
| SLE 1 | systemic lupus erythematosus | 26 | female | /    | immunofluorescence staining |
| SLE 2 | systemic lupus erythematosus | 23 | male   | /    | immunofluorescence staining |
| SLE 3 | systemic lupus erythematosus | 33 | male   | /    | immunofluorescence staining |
| Scl 1 | scleroderma                  | 22 | male   | /    | immunofluorescence staining |
| Scl 2 | scleroderma                  | 30 | male   | /    | immunofluorescence staining |
| Scl 3 | scleroderma                  | 45 | female | /    | immunofluorescence staining |

---

PASI: psoriasis area and severity index.

**Supplemental Table 2.**

## Primary antibody information.

| Target           | Supplier                     | Catalog    | Usage                                            | Dilution          |
|------------------|------------------------------|------------|--------------------------------------------------|-------------------|
| CD31             | Abcam                        | ab199012   | immunofluorescence staining                      | 1:400             |
| HS               | Abcam                        | ab2501     | immunofluorescence staining                      | 1:200             |
| HA               | Abcam                        | ab53842    | immunofluorescence staining                      | 1:200             |
| CD3              | Abcam                        | ab135372   | immunofluorescence staining                      | 1:200             |
| IGFBP7           | Abcam                        | ab74169    | immunofluorescence staining/<br>western blotting | 1:1000/<br>1:1000 |
| Ki67             | Abcam                        | ab15580    | immunofluorescence staining                      | 1:200             |
| ICAM1            | Abcam                        | ab109361   | immunofluorescence staining/<br>western blotting | 1:400/<br>1:1000  |
| SELE             | ABclonal                     | A2191      | immunofluorescence staining/<br>western blotting | 1:200/<br>1:1000  |
| SELP             | Abcam                        | ab178424   | immunofluorescence staining/<br>western blotting | 1:200/<br>1:1000  |
| JAK1             | Proteintech                  | 66466-1-Ig | western blotting                                 | 1:1000            |
| phospho-JAK1     | ABclonal                     | AP0530     | western blotting                                 | 1:1000            |
| JAK2             | ABclonal                     | A19629     | western blotting                                 | 1:1000            |
| phospho-JAK2     | ABclonal                     | AP0531     | western blotting                                 | 1:1000            |
| STAT1            | Cell Signaling<br>Technology | 14994      | western blotting                                 | 1:1000            |
| phospho-STAT1    | Cell Signaling<br>Technology | 7649       | western blotting                                 | 1:1000            |
| STAT3            | Cell Signaling<br>Technology | 9139       | western blotting                                 | 1:1000            |
| phospho-STAT3    | Cell Signaling<br>Technology | 9145       | western blotting                                 | 1:1000            |
| $\beta$ -Tubulin | Immunoway                    | YT4780     | western blotting                                 | 1:2000            |

**Supplemental Table 3.**

Primer sequences for qPCR.

| Primers       | Species      | Forward (5'-3')        | Reverse (5'-3')           |
|---------------|--------------|------------------------|---------------------------|
| <i>IGFBP7</i> | Homo sapiens | tgaagtaactggctgggtgc   | tagctcggcaccttcacctt      |
| <i>SELE</i>   | Homo sapiens | ccgagcgaggetacatgaat   | gcategcatecacagcttc       |
| <i>SELP</i>   | Homo sapiens | gcggtggcttctacgatagg   | ttcatgggtgtttatggaaacctta |
| <i>ICAM1</i>  | Homo sapiens | tgaccatctacagctttccg   | tggaacccattcagcgtc        |
| <i>18S</i>    | Homo sapiens | cagccaccgagattgagca    | tagtagcgcacgggcgggtgtg    |
| <i>S100a8</i> | Mus musculus | aatcaccatgccctctacaag  | cccactttatcaccatcgcaa     |
| <i>S100a9</i> | Mus musculus | ggaaggaaggacacctgac    | ggcttcatttcttctctttcttc   |
| <i>Lcn2</i>   | Mus musculus | tctgtccccaccgaccaa     | ggaaagatggagtggcagaca     |
| <i>Il17a</i>  | Mus musculus | gagagcttcatctgtgtctctg | gcgccaagggagttaaagac      |
| <i>Il23</i>   | Mus musculus | accagcgggacatatgaatc   | agtccttgtgggtcacaacc      |
| <i>Il36g</i>  | Mus musculus | cacagagtaacccagtcagc   | ttcattggctcaggggtgtg      |
| <i>Tnfa</i>   | Mus musculus | ggccccaaaggatgagaagt   | ttgctacgacgtgggtctaca     |
| <i>Vegfa</i>  | Mus musculus | tattcagcggactcaccagc   | aaccaacctcctcaaaccgt      |
| <i>Actb</i>   | Mus musculus | aacagtccgcctagaagcac   | cgttgacatccgtaaagacc      |

**Supplemental Movie 1.**

T cells rolling on control HMEC-1 cells.

**Supplemental Movie 2.**

T cells rolling on HMEC-1 cells with degraded endothelial glycocalyx.

**Supplemental Movie 3.**

T cells rolling on HMEC-1 cells pretreated with rhIGFBP7.

**Supplemental Data 1. (Excel file)**

Top 50 differentially expressed genes in 5 EC clusters from healthy and psoriatic skin. The column avg\_logFC represents the average log [normalized expression of the current group of cells/normalized expression of the rest of the cells]. The column pct.1 represents the percentage of cells expressed in the current group of cells. The column pct.2 represents the percentage of cells expressed in the rest of the cells.

**Supplemental Data 2. (Excel file)**

Top 50 differentially expressed genes in IGFBP7<sup>high</sup> psoriatic skin ECs and IGFBP7<sup>low</sup> psoriatic skin ECs. The column norm\_total\_mean\_high or norm\_total\_mean\_low represents the normalized total mean of counts in IGFBP7<sup>high</sup> or IGFBP7<sup>low</sup> psoriatic ECs. Norm\_foldchange represents [norm\_total\_mean\_high/norm\_total\_mean\_low]. The chi2LR1 represents the Chi-square statistic for hypothesis testing of H0. The column pvalue.adj.FDR represents adjusted *P* value of the H0 *P* value using Benjamini & Hochberg's method.
